# Supplementary material for: Evaluation of Fusarium Head Blight Resistance Effects by Haplotype-Based Genome-Wide Association Study in Winter Wheat Lines Derived by Marker Backcrossing Approach
Source: MDPI journal article supplement (doi:10.3390/ijms232214233), 2022-11-17
Supplement: s1 [file s1]

Table S1. Phenotypic data lines/cultivars tested with two isolates of *F. culmorum*.

| No | Line/Cultivar | Group           | Type_1_2019 | Type_2_2019 | Type_1&2_2019 | Type_1_2020 | Type_2_2020 | Type_1&2_2020 | Type_1_2019&2020 | Type_2_2019&2020 | Type_1&2_2019&2020 | FHBi |
|----|---------------|-----------------|-------------|-------------|---------------|-------------|-------------|---------------|------------------|------------------|--------------------|------|
| 1  | Belenus       | Wheat cultivars | 1.4         | 3.6         | 2.5           | 2.0         | 1.6         | 1.8           | 1.7              | 2.6              | 2.2                | 80   |
| 2  | Belissa       | Wheat cultivars | 1.6         | 2.4         | 2.0           | 1.6         | 2.0         | 1.8           | 1.6              | 2.2              | 1.9                | 80   |
| 3  | Błyskawica    | Wheat cultivars | 1.8         | 4.4         | 3.1           | 1.8         | 1.9         | 1.9           | 1.8              | 3.2              | 2.5                | 90   |
| 4  | Ceres (durum) | Wheat cultivars | 1.8         | 5.8         | 3.8           | 1.0         | 3.3         | 2.2           | 1.4              | 4.6              | 3.0                | 60   |
| 5  | Euforia       | Wheat cultivars | 2.0         | 3.4         | 2.7           | 1.8         | 2.0         | 1.9           | 1.9              | 2.7              | 2.3                | 70   |
| 6  | Opcja         | Wheat cultivars | 1.8         | 2.8         | 2.3           | 1.4         | 1.8         | 1.6           | 1.6              | 2.3              | 2.0                | 70   |
| 7  | Plejada       | Wheat cultivars | 1.8         | 4.2         | 3.0           | 1.2         | 2.9         | 2.1           | 1.5              | 3.6              | 2.5                | 60   |
| 8  | Reduta        | Wheat cultivars | 2.4         | 2.4         | 2.4           | 1.4         | 5.4         | 3.4           | 1.9              | 3.9              | 2.9                | 70   |
| 9  | Sfera         | Wheat cultivars | 1.8         | 3.4         | 2.6           | 1.4         | 1.8         | 1.6           | 1.6              | 2.6              | 2.1                | 90   |
| 10 | Tobak         | Wheat cultivars | 1.6         | 5.2         | 3.4           | 2.2         | 3.4         | 2.8           | 1.9              | 4.3              | 3.1                | 90   |
| 11 | Wilejka       | Wheat cultivars | 2.0         | 2.6         | 2.3           | 2.0         | 3.3         | 2.7           | 2.0              | 3.0              | 2.5                | 70   |
| 12 | FUS_12_52     | Family Fhb1     | 1.4         | 1.4         | 1.4           | 2.0         | 1.1         | 1.6           | 1.7              | 1.3              | 1.5                | 20   |
| 13 | FUS_12_76     | Family Fhb1     | 1.8         | 1.2         | 1.5           | 1.8         | 1.3         | 1.6           | 1.8              | 1.3              | 1.5                | 30   |
| 14 | FUS_24_130    | Family Fhb1     | 1.0         | 1.6         | 1.3           | 1.6         | 1.6         | 1.6           | 1.3              | 1.6              | 1.5                | 20   |
| 15 | FUS_24_131    | Family Fhb1     | 1.6         | 2.6         | 2.1           | 1.4         | 1.9         | 1.7           | 1.5              | 2.3              | 1.9                | 40   |
| 16 | FUS_24_133    | Family Fhb1     | 1.8         | 1.6         | 1.7           | 1.2         | 2.2         | 1.7           | 1.5              | 1.9              | 1.7                | 60   |
| 17 | FUS_24_134    | Family Fhb1     | 1.0         | 1.8         | 1.4           | 1.2         | 1.5         | 1.4           | 1.1              | 1.7              | 1.4                | 20   |
| 18 | FUS_24_140    | Family Fhb1     | 1.2         | 1.8         | 1.5           | 1.8         | 2.0         | 1.9           | 1.5              | 1.9              | 1.7                | 40   |
| 19 | FUS_24_169    | Family Fhb1     | 1.4         | 1.6         | 1.5           | 1.4         | 1.7         | 1.6           | 1.4              | 1.7              | 1.5                | 40   |
| 20 | FUS_27_241    | Family Fhb1     | 1.4         | 1.6         | 1.5           | 2.6         | 1.4         | 2.0           | 2.0              | 1.5              | 1.8                | 30   |
| 21 | FUS_27_243    | Family Fhb1     | 1.2         | 1.2         | 1.2           | 1.4         | 1.4         | 1.4           | 1.3              | 1.3              | 1.3                | 20   |
| 22 | FUS_27_246    | Family Fhb1     | 1.8         | 2.0         | 1.9           | 2.4         | 1.6         | 2.0           | 2.1              | 1.8              | 2.0                | 30   |
| 23 | FUS_27_247    | Family Fhb1     | 1.8         | 2.2         | 2.0           | 1.4         | 1.5         | 1.5           | 1.6              | 1.9              | 1.7                | 20   |
| 24 | FUS_27_249    | Family Fhb1     | 1.8         | 1.6         | 1.7           | 1.6         | 1.3         | 1.5           | 1.7              | 1.5              | 1.6                | 20   |
| 25 | FUS_27_255    | Family Fhb1     | 1.8         | 2.0         | 1.9           | 1.4         | 1.3         | 1.4           | 1.6              | 1.7              | 1.6                | 30   |
| 26 | FUS_27_280    | Family Fhb1     | 1.4         | 2.0         | 1.7           | 1.4         | 1.8         | 1.6           | 1.4              | 1.9              | 1.7                | 10   |
| 27 | FUS_27_292    | Family Fhb1     | 2.2         | 1.4         | 1.8           | 2.8         | 1.4         | 2.1           | 2.5              | 1.4              | 2.0                | 20   |
| 28 | FUS_27_296    | Family Fhb1     | 1.8         | 1.6         | 1.7           | 1.2         | 1.1         | 1.2           | 1.5              | 1.4              | 1.4                | 30   |
| 29 | FUS_27_301    | Family Fhb1     | 2.2         | 1.8         | 2.0           | 1.8         | 1.2         | 1.5           | 2.0              | 1.5              | 1.8                | 40   |
| 30 | FUS_27_302    | Family Fhb1     | 2.0         | 1.8         | 1.9           | 2.2         | 1.5         | 1.9           | 2.1              | 1.7              | 1.9                | 40   |
| 31 | FUS_27_305    | Family Fhb1     | 1.6         | 2.2         | 1.9           | 1.6         | 1.6         | 1.6           | 1.6              | 1.9              | 1.8                | 40   |
| 32 | FUS_27_316    | Family Fhb1     | 2.4         | 1.4         | 1.9           | 2.4         | 1.2         | 1.8           | 2.4              | 1.3              | 1.9                | 30   |
| 33 | FUS_27_318    | Family Fhb1     | 1.8         | 1.0         | 1.4           | 1.6         | 1.3         | 1.5           | 1.7              | 1.2              | 1.4                | 30   |
| 34 | FUS_27_343    | Family Fhb1     | 2.2         | 1.8         | 2.0           | 1.8         | 1.4         | 1.6           | 2.0              | 1.6              | 1.8                | 50   |
| 35 | FUS_27_1369   | Family Fhb1     | 2.2         | 1.0         | 1.6           | 1.2         | 1.2         | 1.2           | 1.7              | 1.1              | 1.4                | 40   |
| 36 | FUS_34_369    | Family Fhb1     | 1.4         | 1.6         | 1.5           | 1.6         | 1.7         | 1.7           | 1.5              | 1.7              | 1.6                | 60   |
| 37 | FUS_34_383    | Family Fhb1     | 1.2         | 1.4         | 1.3           | 2.0         | 1.5         | 1.8           | 1.6              | 1.5              | 1.5                | 70   |
| 38 | FUS_34_395    | Family Fhb1     | 1.4         | 3.2         | 2.3           | 1.8         | 1.5         | 1.7           | 1.6              | 2.4              | 2.0                | 60   |

|    |                       |                    |     |     |     |     |     |     |     |     |     |     |
|----|-----------------------|--------------------|-----|-----|-----|-----|-----|-----|-----|-----|-----|-----|
| 39 | FUS_34_403            | Family Fhb1        | 1.2 | 1.8 | 1.5 | 2.2 | 1.1 | 1.7 | 1.7 | 1.5 | 1.6 | 50  |
| 40 | FUS_34_405            | Family Fhb1        | 1.4 | 1.6 | 1.5 | 1.6 | 1.2 | 1.4 | 1.5 | 1.4 | 1.5 | 50  |
| 41 | FUS_34_420            | Family Fhb1        | 1.2 | 1.6 | 1.4 | 1.4 | 1.4 | 1.4 | 1.3 | 1.5 | 1.4 | 40  |
| 42 | FUS_34_429            | Family Fhb1        | 2.0 | 1.6 | 1.8 | 1.8 | 1.6 | 1.7 | 1.9 | 1.6 | 1.8 | 60  |
| 43 | FUS_34_441            | Family Fhb1        | 1.6 | 1.8 | 1.7 | 1.2 | 1.5 | 1.4 | 1.4 | 1.7 | 1.5 | 70  |
| 44 | FUS_34_458            | Family Fhb1        | 1.2 | 1.8 | 1.5 | 1.6 | 1.2 | 1.4 | 1.4 | 1.5 | 1.5 | 60  |
| 45 | FUS_34_468            | Family Fhb1        | 2.2 | 1.4 | 1.8 | 1.8 | 1.6 | 1.7 | 2.0 | 1.5 | 1.8 | 70  |
| 46 | FUS_34_470            | Family Fhb1        | 1.4 | 1.8 | 1.6 | 2.2 | 1.0 | 1.6 | 1.8 | 1.4 | 1.6 | 40  |
| 47 | FUS_34_475            | Family Fhb1        | 1.4 | 1.6 | 1.5 | 1.8 | 1.9 | 1.9 | 1.6 | 1.8 | 1.7 | 50  |
| 48 | FUS_34_1495           | Family Fhb1        | 1.4 | 1.4 | 1.4 | 1.8 | 1.6 | 1.7 | 1.6 | 1.5 | 1.6 | 60  |
| 49 | FUS_40_481            | Family Fhb1        | 1.2 | 2.0 | 1.6 | 1.0 | 1.8 | 1.4 | 1.1 | 1.9 | 1.5 | 40  |
| 50 | FUS_40_484            | Family Fhb1        | 1.8 | 1.8 | 1.8 | 2.0 | 1.5 | 1.8 | 1.9 | 1.7 | 1.8 | 60  |
| 51 | FUS_40_491            | Family Fhb1        | 2.0 | 1.4 | 1.7 | 1.2 | 1.7 | 1.5 | 1.6 | 1.6 | 1.6 | 40  |
| 52 | FUS_40_494            | Family Fhb1        | 1.6 | 2.2 | 1.9 | 1.4 | 1.5 | 1.5 | 1.5 | 1.9 | 1.7 | 60  |
| 53 | FUS_40_495            | Family Fhb1        | 1.8 | 1.6 | 1.7 | 2.2 | 1.3 | 1.8 | 2.0 | 1.5 | 1.7 | 60  |
| 54 | FUS_40_498            | Family Fhb1        | 1.8 | 2.2 | 2.0 | 2.4 | 1.8 | 2.1 | 2.1 | 2.0 | 2.1 | 80  |
| 55 | FUS_40_506            | Family Fhb1        | 1.6 | 1.8 | 1.7 | 1.8 | 1.8 | 1.8 | 1.7 | 1.8 | 1.8 | 80  |
| 56 | FUS_40_510            | Family Fhb1        | 2.4 | 2.2 | 2.3 | 1.8 | 1.7 | 1.8 | 2.1 | 2.0 | 2.0 | 70  |
| 57 | FUS_40_511            | Family Fhb1        | 1.8 | 2.4 | 2.1 | 1.4 | 1.5 | 1.5 | 1.6 | 2.0 | 1.8 | 60  |
| 58 | FUS_40_513            | Family Fhb1        | 1.2 | 1.8 | 1.5 | 1.4 | 1.7 | 1.6 | 1.3 | 1.8 | 1.5 | 60  |
| 59 | FUS_40_516            | Family Fhb1        | 1.4 | 1.4 | 1.4 | 1.6 | 1.7 | 1.7 | 1.5 | 1.6 | 1.5 | 50  |
| 60 | FUS_40_529            | Family Fhb1        | 1.6 | 1.2 | 1.4 | 1.4 | 1.9 | 1.7 | 1.5 | 1.6 | 1.5 | 40  |
| 61 | FUS_12_10_c           | Check family       | 2.0 | 2.6 | 2.3 | 1.8 | 2.5 | 2.2 | 1.9 | 2.6 | 2.2 | 30  |
| 62 | FUS_12_16_c           | Check family       | 1.8 | 2.8 | 2.3 | 1.8 | 2.3 | 2.1 | 1.8 | 2.6 | 2.2 | 30  |
| 63 | FUS_12_27_c           | Check family       | 2.0 | 2.6 | 2.3 | 2.0 | 2.6 | 2.3 | 2.0 | 2.6 | 2.3 | 40  |
| 64 | FUS_24_147_c          | Check family       | 1.2 | 2.8 | 2.0 | 1.0 | 2.9 | 2.0 | 1.1 | 2.9 | 2.0 | 60  |
| 65 | FUS_24_150_c          | Check family       | 1.4 | 2.6 | 2.0 | 1.6 | 3.6 | 2.6 | 1.5 | 3.1 | 2.3 | 30  |
| 66 | FUS_24_153_c          | Check family       | 1.4 | 3.2 | 2.3 | 1.8 | 3.0 | 2.4 | 1.6 | 3.1 | 2.4 | 60  |
| 67 | FUS_27_248_c          | Check family       | 1.8 | 1.4 | 1.6 | 2.2 | 2.9 | 2.6 | 2.0 | 2.2 | 2.1 | 50  |
| 68 | FUS_27_268_c          | Check family       | 1.6 | 2.8 | 2.2 | 1.4 | 2.2 | 1.8 | 1.5 | 2.5 | 2.0 | 60  |
| 69 | FUS_27_269_c          | Check family       | 1.6 | 2.8 | 2.2 | 1.4 | 2.0 | 1.7 | 1.5 | 2.4 | 2.0 | 60  |
| 70 | FUS_34_381_c          | Check family       | 1.8 | 3.6 | 2.7 | 1.2 | 3.0 | 2.1 | 1.5 | 3.3 | 2.4 | 80  |
| 71 | FUS_34_389_c          | Check family       | 1.4 | 2.0 | 1.7 | 2.2 | 3.4 | 2.8 | 1.8 | 2.7 | 2.3 | 70  |
| 72 | FUS_34_390_c          | Check family       | 1.6 | 2.8 | 2.2 | 1.8 | 4.4 | 3.1 | 1.7 | 3.6 | 2.7 | 80  |
| 73 | FUS_40_482_c          | Check family       | 1.6 | 3.0 | 2.3 | 1.6 | 2.9 | 2.3 | 1.6 | 3.0 | 2.3 | 80  |
| 74 | FUS_40_483_c          | Check family       | 1.6 | 2.0 | 1.8 | 2.0 | 2.3 | 2.2 | 1.8 | 2.2 | 2.0 | 80  |
| 75 | FUS_40_502_c          | Check family       | 1.4 | 3.2 | 2.3 | 1.2 | 2.2 | 1.7 | 1.3 | 2.7 | 2.0 | 90  |
| 76 | SMH 8694 (S)          | Susceptible checks | 1.8 | 3.0 | 2.4 | 2.8 | 5.4 | 4.1 | 2.3 | 4.2 | 3.3 | 90  |
| 77 | SMH 8816 (S)          | Susceptible checks | 1.4 | 3.6 | 2.5 | 1.4 | 5.2 | 3.3 | 1.4 | 4.4 | 2.9 | 80  |
| 78 | DL325/11/3 (S)        | Susceptible checks | 1.6 | 4.0 | 2.8 | 1.6 | 6.2 | 3.9 | 1.6 | 5.1 | 3.4 | 90  |
| 79 | KBP 14 16 (S)         | Susceptible checks | 1.4 | 4.6 | 3.0 | 1.6 | 6.2 | 3.9 | 1.5 | 5.4 | 3.5 | 100 |
| 80 | 20828 [Fhb1-]         | Resistant checks   | 1.4 | 1.0 | 1.2 | 1.0 | 1.2 | 1.1 | 1.2 | 1.1 | 1.2 | 30  |
| 81 | A40-19-1-2            | Resistant checks   | 1.2 | 1.4 | 1.3 | 1.4 | 1.1 | 1.3 | 1.3 | 1.3 | 1.3 | 40  |
| 82 | Arina                 | Resistant checks   | 1.8 | 1.8 | 1.8 | 1.6 | 2.2 | 1.9 | 1.7 | 2.0 | 1.9 | 80  |
| 83 | Fregata               | Resistant checks   | 2.4 | 1.6 | 2.0 | 1.0 | 2.1 | 1.6 | 1.7 | 1.9 | 1.8 | 50  |
| 84 | UNG 136.6.1.1 [Fhb1+] | Resistant checks   | 2.0 | 1.6 | 1.8 | 1.4 | 1.1 | 1.3 | 1.7 | 1.4 | 1.5 | 70  |

|    |              |                  |     |     |     |     |     |     |     |     |     |    |
|----|--------------|------------------|-----|-----|-----|-----|-----|-----|-----|-----|-----|----|
| 85 | S 10 [Fhb1+] | Resistant checks | 1.6 | 1.2 | 1.4 | 2.4 | 1.0 | 1.7 | 2.0 | 1.1 | 1.6 | 30 |
| 86 | S 30 [Fhb1+] | Resistant checks | 1.2 | 0.6 | 0.9 | 1.8 | 1.4 | 1.6 | 1.5 | 1.0 | 1.2 | 40 |
| 87 | S 32 [Fhb1+] | Resistant checks | 1.8 | 0.8 | 1.3 | 2.0 | 0.9 | 1.4 | 1.9 | 0.8 | 1.4 | 40 |

Table S2. Haplotypes described in MTA with Bonferroni correction represented in wheat families.

| HT          | Wheat families                                                                                                                                                                                                                                                                                                                                                                                  |
|-------------|-------------------------------------------------------------------------------------------------------------------------------------------------------------------------------------------------------------------------------------------------------------------------------------------------------------------------------------------------------------------------------------------------|
| Ch2D_B35_H1 | FUS_12_52, FUS_12_76, FUS_24_130, FUS_24_131, FUS_24_134, FUS_24_140, FUS_24_169, FUS_27_243, FUS_27_301, FUS_27_246, FUS_27_280, FUS_27_249, FUS_27_255, FUS_27_292, FUS_34_1495, FUS_34_369, FUS_34_458, FUS_34_420, FUS_34_429, FUS_34_395, FUS_34_405, FUS_34_468, FUS_34_381_c, FUS_40_513, FUS_40_481, FUS_40_516, FUS_40_484, FUS_40_491, FUS_40_495, FUS_40_510, FUS_40_494, FUS_34_470 |
| Ch2D_B35_H2 | FUS_12_16_c, FUS_12_27_c, FUS_12_10_c, FUS_24_150_c, FUS_24_153_c, FUS_27_247, FUS_27_269_c, FUS_27_268_c, FUS_27_248_c, FUS_34_389_c, FUS_34_390_c, FUS_40_511, FUS_40_483_c, FUS_40_502_c, FUS_40_482_c                                                                                                                                                                                       |
| Ch3B_B9_H2  | FUS_12_27_c, FUS_12_10_c, FUS_24_150_c, FUS_24_153_c, FUS_24_147_c, FUS_27_247, FUS_27_269_c, FUS_27_268_c, FUS_27_248_c, FUS_34_389_c, FUS_34_390_c, FUS_40_511, FUS_40_483_c, FUS_40_502_c, FUS_40_482_c                                                                                                                                                                                      |
| Ch7D_B63_H4 | FUS_34_381_c, FUS_34_389_c, FUS_34_390_c                                                                                                                                                                                                                                                                                                                                                        |

Table S3. Haploblocks used for association weight matrix creation.

| No | Haploblock | Chromosome | Start (bp <sup>1</sup> ) | Stop (bp) | Influence <sup>2</sup> | No of connections <sup>3</sup> |
|----|------------|------------|--------------------------|-----------|------------------------|--------------------------------|
| 1  | Ch1B_B57   | 1B         | 550476176                | 554267102 | 0                      | 9                              |
| 2  | Ch6D_B99   | 6D         | 493598133                | 493701062 | 0                      | 18                             |
| 3  | Ch7A_B103  | 7A         | 663484676                | 672234914 | 0                      | 17                             |
| 4  | Ch2D_B35   | 2D         | 32388539                 | 32388595  | 0                      | 15                             |
| 5  | Ch5A_B45   | 5A         | 461525128                | 478177901 | 0                      | 4                              |
| 6  | Ch6D_B91   | 6D         | 485009388                | 485216394 | 0.3                    | 15                             |
| 7  | Ch5D_B25   | 5D         | 301099862                | 306943258 | 1.1                    | 15                             |
| 8  | Ch2D_B44   | 2D         | 40479955                 | 45844025  | 1.3                    | 11                             |
| 9  | Ch2D_B65   | 2D         | 146980860                | 146981379 | 1.3                    | 14                             |
| 10 | Ch3B_B11   | 3B         | 15056092                 | 16649400  | 1.5                    | 16                             |
| 11 | Ch3A_B6    | 3A         | 12622011                 | 12622051  | 1.7                    | 16                             |
| 12 | Ch3A_B8    | 3A         | 13838412                 | 13838478  | 1.7                    | 16                             |
| 13 | Ch3B_B6    | 3B         | 10276362                 | 10999531  | 1.7                    | 16                             |
| 14 | Ch3B_B9    | 3B         | 13276831                 | 13633016  | 1.7                    | 16                             |
| 15 | Ch2B_B17   | 2B         | 29914867                 | 30019767  | 2.3                    | 17                             |
| 16 | Ch1B_B82   | 1B         | 648260077                | 649478384 | 3.3                    | 18                             |
| 17 | Ch5D_B80   | 5D         | 541495332                | 546776260 | 4.1                    | 17                             |
| 18 | Ch3D_B5    | 3B         | 6675747                  | 7017502   | 4.1                    | 14                             |
| 19 | Ch3B_B12   | 3B         | 16819271                 | 16819271  | 5.9                    | 15                             |

<sup>1</sup> base pairs; <sup>2</sup> according to betweenness centrality metrics; <sup>3</sup> according to degree centrality metrics; <sup>2</sup> and <sup>3</sup> calculated according to OpenOrd protocol in Gephi 0.9.2 tool.

Table S4. Polish winter wheat breeding lines tested as potential recurrent parent in comparison to *Fhb1* gene donor line AIII62. Microsatellite allele products.

| No        | Name              | Origin                           | Marker name (product size- bp) |            |            |            |            |
|-----------|-------------------|----------------------------------|--------------------------------|------------|------------|------------|------------|
|           |                   |                                  | UMN10                          | gwm389     | barc12     | gwm493     | gpw3248    |
| 1         | AIII62*           | Radzików                         | 239                            | 139        | 187        | 205        | 254        |
| 2         | Zawisza           | HR Smolice <sup>1</sup>          | 236                            | 139        | 187        | 144        | 250        |
| <b>3</b>  | <b>SMH 8527</b>   | <b>HR Smolice</b>                | <b>236</b>                     | <b>151</b> | <b>177</b> | <b>144</b> | <b>269</b> |
| 4         | SMH 113           | HR Smolice                       | 236                            | 143        | 187        | 144        | 271        |
| 5         | SMH 213           | HR Smolice                       | 236                            | u          | 177        | 144        | 264        |
| 6         | SMH 8553          | HR Smolice                       | 236                            | 139        | u          | 144        | 269        |
| 7         | SMH 8823          | HR Smolice                       | 236                            | 137        | 221        | 144        | 271        |
| 8         | DD 13 /10-4       | Danko <sup>2</sup> HR            | 236                            | 121        | 177        | 144        | 250        |
| 9         | DD 237/09         | Danko HR                         | 236                            | u          | 198        | 144        | 264        |
| 10        | DD 283/10         | Danko HR                         | 236                            | u          | 187        | 144        | 250        |
| 11        | DC 489/10         | Danko HR                         | 236                            | 121        | u          | 144        | 250        |
| 12        | DC 4010/10        | Danko HR                         | 236                            | 143        | 187        | u          | 250        |
| 13        | DC 4176/09        | Danko HR                         | 236                            | 121        | 177        | 144        | 254        |
| 14        | DL 338/10         | Danko HR                         | 236                            | 143        | 187        | u          | 254        |
| <b>15</b> | <b>DL 414/10</b>  | <b>Danko HR</b>                  | <b>236</b>                     | <b>121</b> | <b>253</b> | <b>144</b> | <b>u</b>   |
| 16        | DL 428/10         | Danko HR                         | 236                            | 114        | 177        | 147        | 254        |
| 17        | STH 6212          | HR Strzelce <sup>3</sup>         | 236                            | u          | 214        | 144        | 250        |
| <b>18</b> | <b>STH 1178</b>   | <b>HR Strzelce</b>               | <b>236</b>                     | <b>143</b> | <b>198</b> | <b>144</b> | <b>271</b> |
| 19        | STH 1116          | HR Strzelce                      | 236                            | u          | 198        | 144        | 250        |
| 20        | STH 3099          | HR Strzelce                      | 236                            | u          | 177        | 144        | 254        |
| 21        | STH 10- 0007      | HR Strzelce                      | 236                            | 143        | 198        | 144        | 250        |
| 22        | STH 10- 0010      | HR Strzelce                      | 236                            | 143        | 187        | 144        | 250        |
| 23        | STH 11637         | HR Strzelce                      | 236                            | 139        | 177        | 200        | 252        |
| <b>24</b> | <b>MIB 11 262</b> | <b>Małopolska<sup>4</sup> HR</b> | <b>236</b>                     | <b>151</b> | <b>177</b> | <b>144</b> | <b>250</b> |
| 25        | MIB 12 221        | Małopolska HR                    | 236                            | 139        | 221        | 144        | 254        |
| 26        | AND 990/09        | Poznańska <sup>5</sup> HR        | 236                            | u          | 177        | 144        | 252        |
| 27        | AND 462/09        | Poznańska HR                     | 236                            | 121        | 187        | 144        | 252        |
| 28        | AND 242/10        | Poznańska HR                     | 236                            | u          | 187        | u          | 261        |
| 29        | AND 708/10        | Poznańska HR                     | 236                            | u          | 177        | 144        | 269        |
| <b>30</b> | <b>NAD 10041</b>  | <b>Poznańska HR</b>              | <b>236</b>                     | <b>151</b> | <b>177</b> | <b>144</b> | <b>269</b> |
| 31        | NAD 11053         | Poznańska HR                     | 236                            | 139        | 187        | 144        | 271        |
| 32        | NAD 8046          | Poznańska HR                     | 236                            | u          | 187        | u          | 250        |
| 33        | NAD 10080         | Poznańska HR                     | 236                            | u          | 177        | 144        | 264        |
| 34        | KBP 10-18 A       | Małopolska HR                    | 236                            | 137        | 198        | 147        | 254        |
| 35        | KBP 10-8          | Małopolska HR                    | 236                            | 139        | 177        | 144        | 264        |

Polish breeding company <sup>1</sup>Hodowla Roślin Smolice, Smolice, Poland; <sup>2</sup>Danko Hodowla Roślin, Choryń, Poland;

<sup>3</sup>Hodowla Roślin Strzelce, Strzelce, Poland; <sup>4</sup>Małopolska Hodowla Roślin, Kraków Poland; <sup>5</sup>Poznańska Hodowla Roślin, Tulce, Poland;

\* indicates *Fhb1* donor line derived in Plant Breeding and Acclimatization Institute – National Research Institute, Radzików, Poland

- bold indicates breeding lines chosen as a RP,

- u - unknown PCR product, bp – base pairs
