# Supplementary material for: Evaluation of Fusarium Head Blight Resistance Effects by Haplotype-Based Genome-Wide Association Study in Winter Wheat Lines Derived by Marker Backcrossing Approach
Source: MDPI journal article supplement (doi:10.3390/ijms232214233), 2022-11-17
Supplement: s1 [file s1]

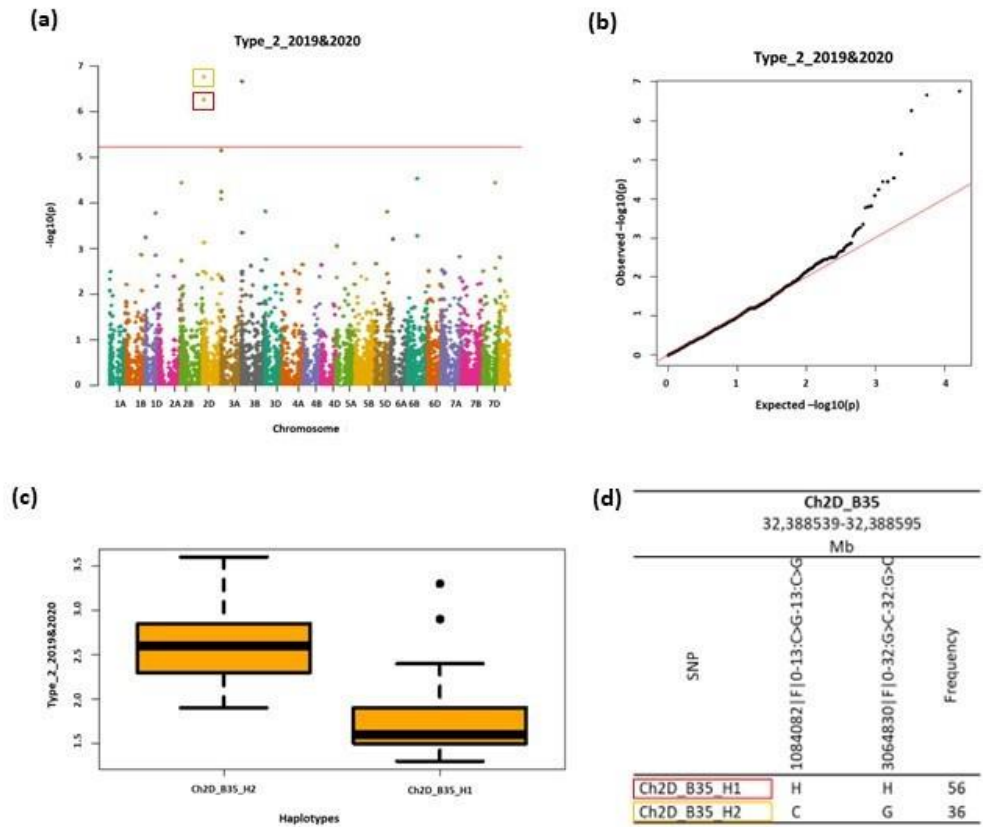

**Figure S1.** (a) Manhattan plot on 21 wheat chromosomes for Type\_2\_2019&2020 trait. Red horizontal dash represents the GWAS threshold of  $-\log(p) = 5.22$  for Bonferroni correction and dots above the red line indicate significant MTAs. (b) Q-Q plot for GWAS results for Type\_2\_2019&2020 trait. (c) Boxplots indicating the phenotype value of Type\_2\_2019&2020 trait corresponding to the two haplotypes (H1 and H2) in the same haploblock (Ch2D\_B35) on chromosome 2D. (d) Haplotype block based on two SNP markers on chromosome 2D; both haplotypes are significantly associated with the Type\_2\_2019&2020 trait (MTA). Frequency shows occurrence (percentage) of haplotypes in the group of families.

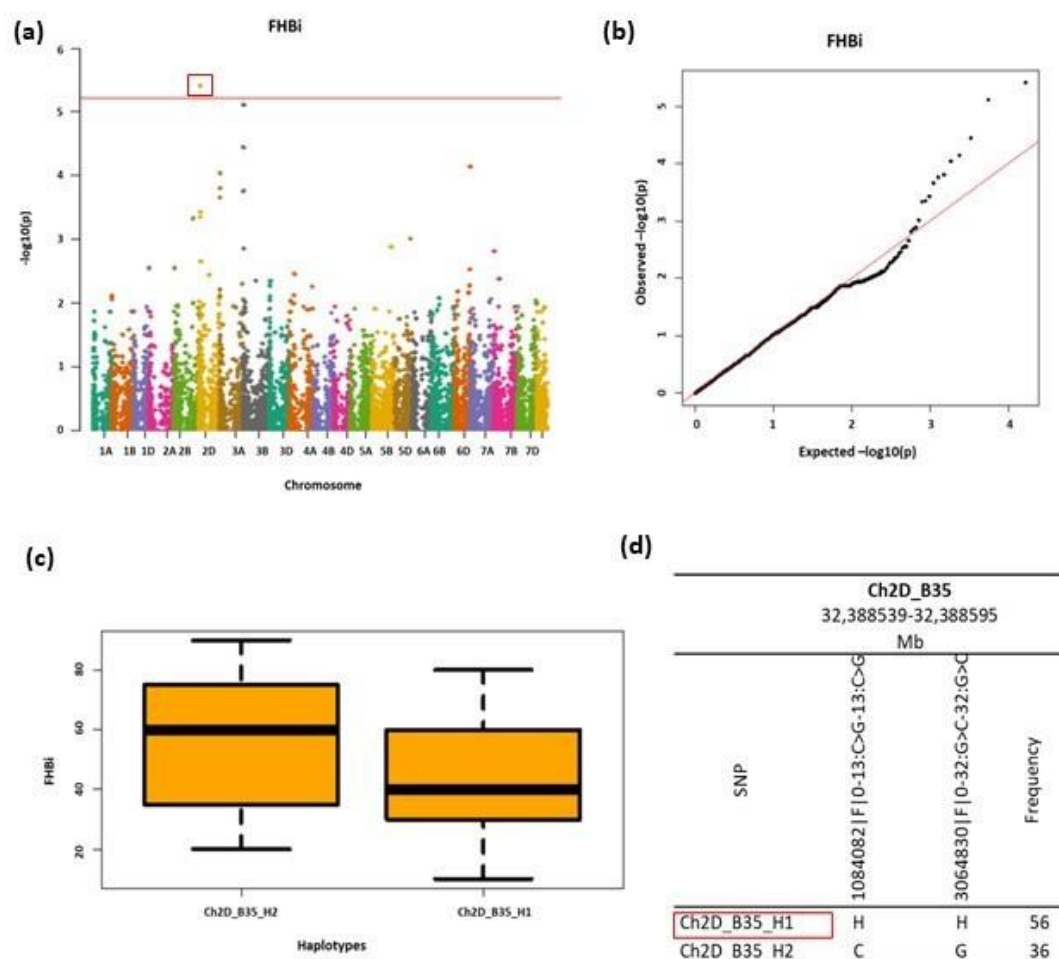

**Figure S2.** (a) Manhattan plot on 21 wheat chromosomes for FHBi trait. Red horizontal dash represents the GWAS threshold of  $-\log(p) = 5.22$  for Bonferroni correction and dot above the red line indicate significant MTA. (b) Q-Q plot for GWAS results for FHBi trait. (c) Boxplots indicating the phenotype value of FHBi trait corresponding to haplotypes in the haploblock Ch2D\_B35 on chromosome 2D. (d) Haplotype block based on two SNP markers on chromosome 2D; haplotype significantly associated with the FHBi trait (MTA) marked with red. Frequency shows occurrence (percentage) of haplotypes in the group of families.

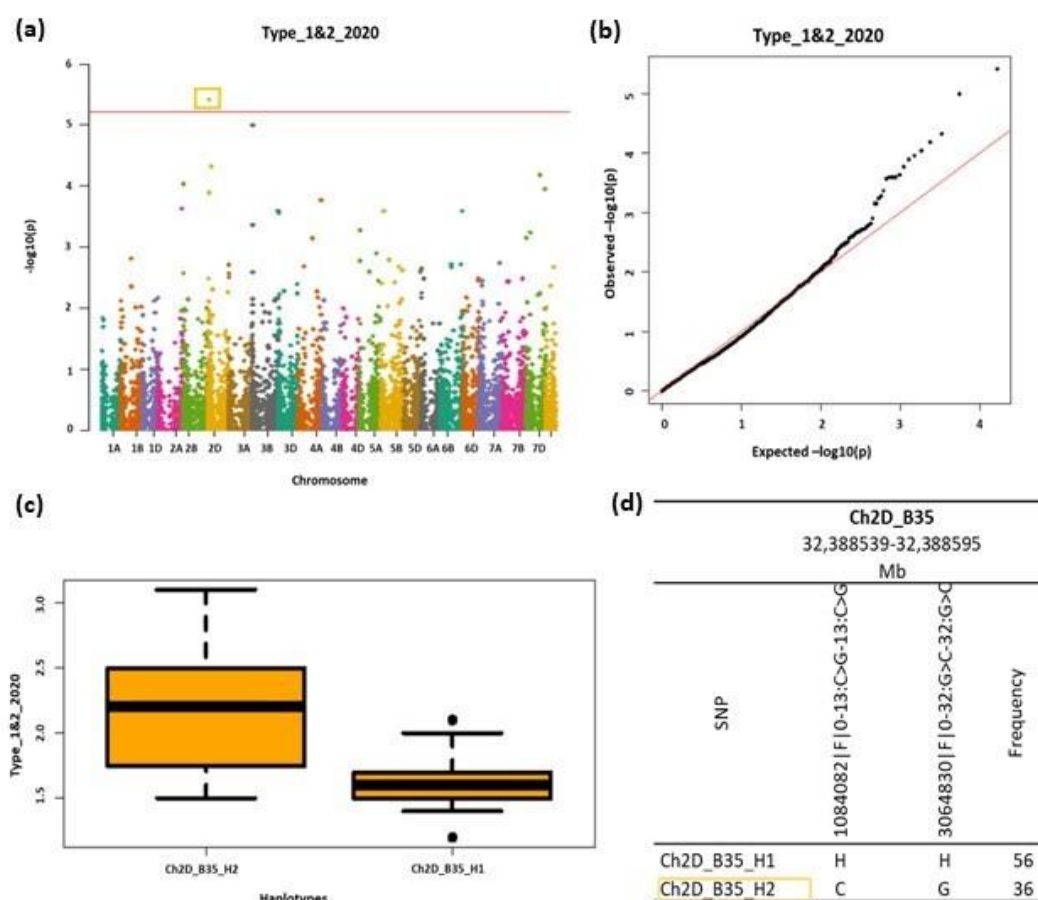

**Figure S3.** (a) Manhattan plot on 21 wheat chromosomes for Type\_1&2\_2020 trait. Red horizontal dash represents the GWAS threshold of  $-\log(p) = 5.22$  for Bonferroni correction and a dot above the red line indicate significant MTA. (b) Q-Q plot for GWAS results for Type\_1&2\_2020 trait. (c) Boxplots indicating the phenotype value of Type\_1&2\_2020 trait corresponding to haplotypes in the haploblock Ch2D\_B35 on chromosome 2D. (d) Haplotype block based on two SNP markers on chromosome 2D; haplotype significantly associated with the Type\_1&2\_2020 trait (MTA) marked with yellow. Frequency shows occurrence (percentage) of haplotypes in the group of families.

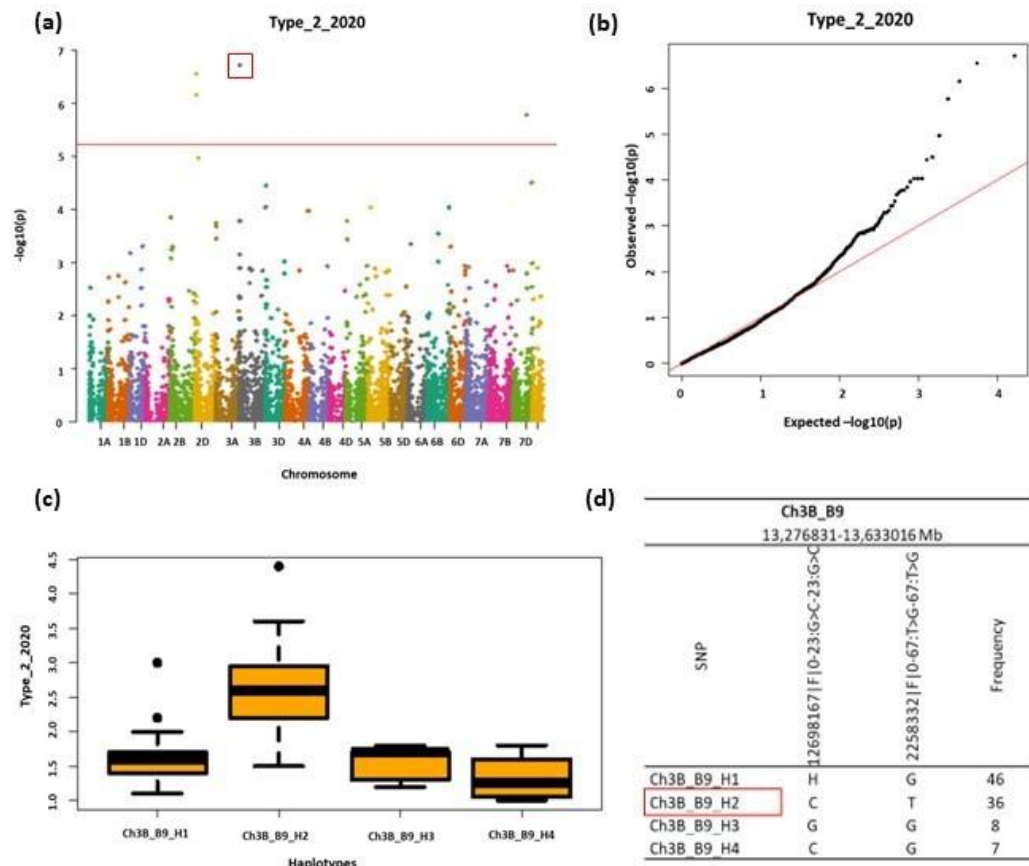

**Figure S4.** (a) Manhattan plot on 21 wheat chromosomes for Type\_2\_2020 trait. Red horizontal dash represents the GWAS threshold of  $-\log(p) = 5.22$  for Bonferroni correction and dots above the red line indicate significant MTAs. (b) Q-Q plot for GWAS results for Type\_2\_2020 trait. (c) Boxplots indicating the phenotype value of Type\_2\_2020 trait corresponding to haplotypes in the haploblock Ch3B\_B9 on chromosome 3B. (d) Haplotype block based on two SNP markers on chromosome 3B; haplotype significantly associated with the Type\_2\_2020 trait (MTA) marked with red. Frequency shows occurrence (percentage) of haplotypes in the group of families.

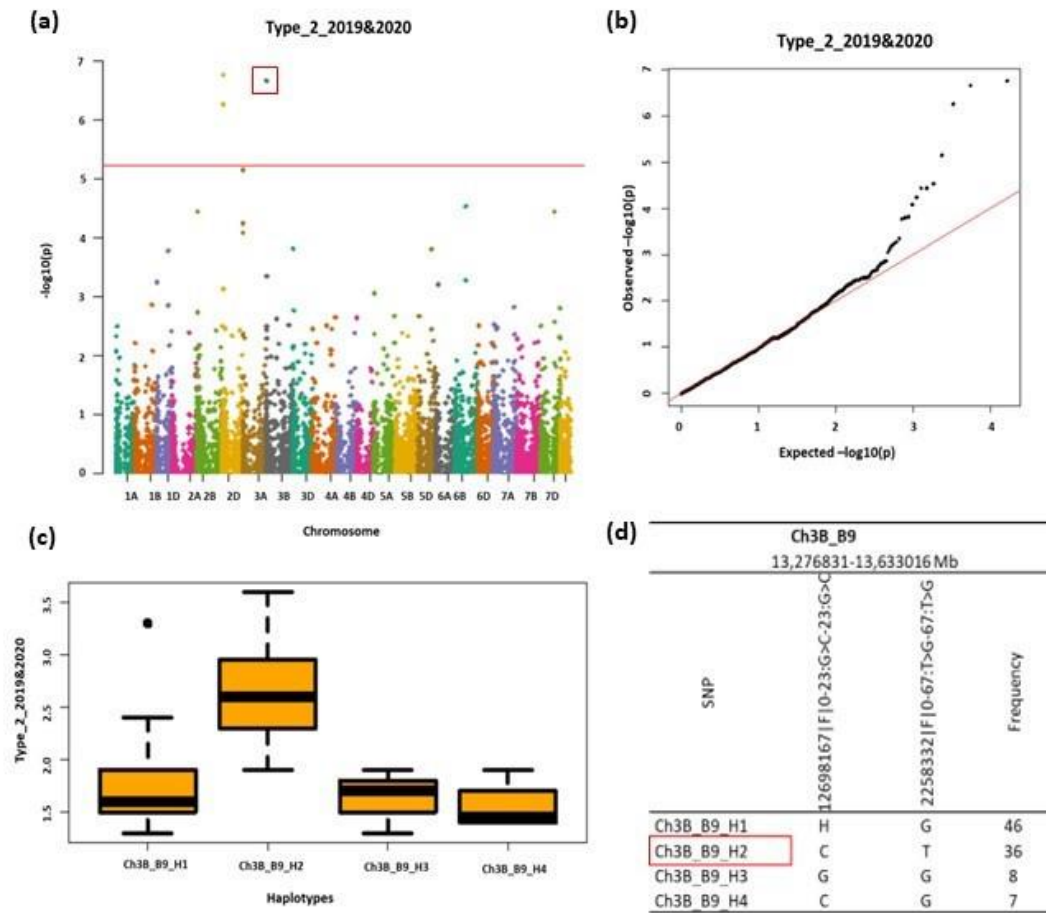

**Figure S5.** (a) Manhattan plot on 21 wheat chromosomes for Type\_2\_2019&2020 trait. Red horizontal dash represents the GWAS threshold of  $-\log(p) = 5.22$  for Bonferroni correction and dots above the red line indicate significant MTAs. (b) Q-Q plot for GWAS results for Type\_2\_2019&2020 trait. (c) Boxplots indicating the phenotype value of Type\_2\_2019&2020 trait corresponding to haplotypes in the haploblock Ch3B\_B9 on chromosome 3B. (d) Haplotype block based on two SNP markers on chromosome 3B; haplotype significantly associated with the Type\_2\_2019&2020 trait (MTA) marked with red. Frequency shows occurrence (percentage) of haplotypes in the group of families.

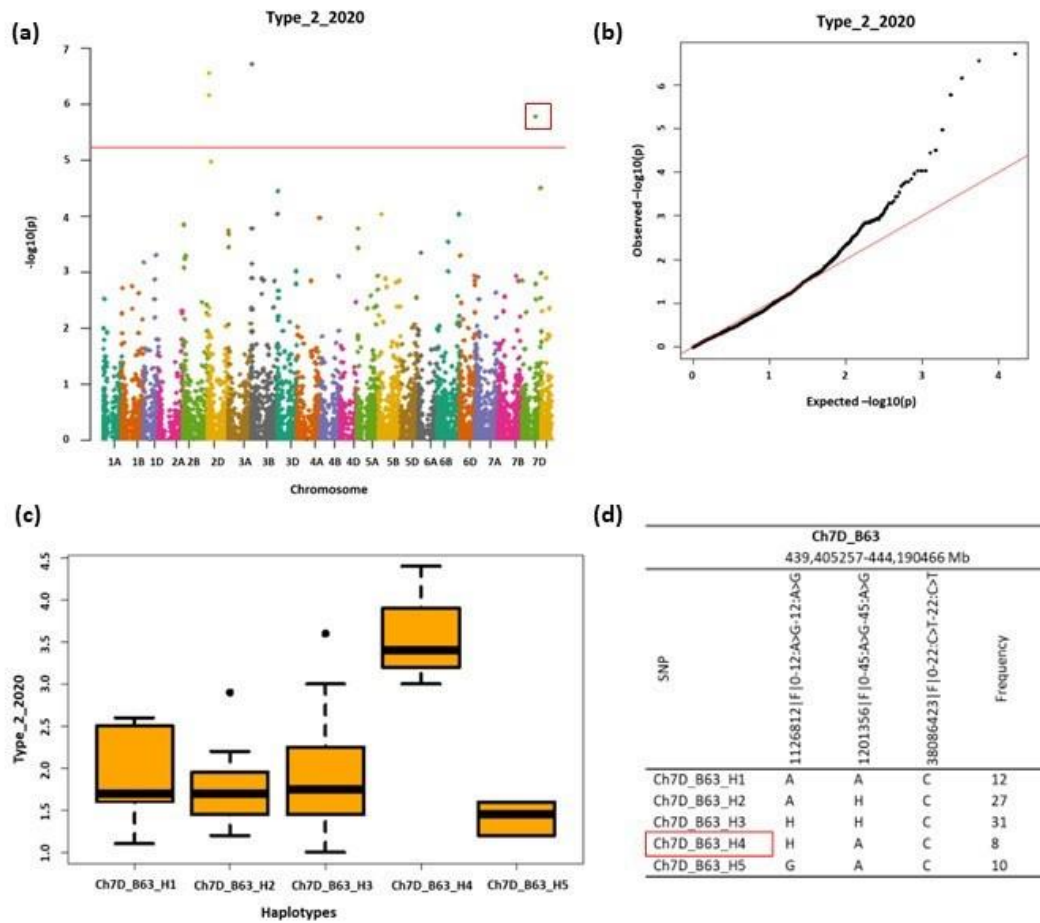

**Figure S6.** (a) Manhattan plot on 21 wheat chromosomes for Type\_2\_2020 trait. Red horizontal dash represents the GWAS threshold of  $-\log(p) = 5.22$  for Bonferroni correction and dots above the red line indicate significant MTAs. (b) Q-Q plot for GWAS results for Type\_2\_2020 trait. (c) Boxplots indicating the phenotype value of Type\_2\_2020 trait corresponding to haplotypes in the haploblock Ch7D\_B63 on chromosome 7D. (d) Haplotype block based on three SNP markers on chromosome 7D; haplotype significantly associated with the Type\_2\_2020 trait (MTA) marked with red. Frequency shows occurrence (percentage) of haplotypes in the group of families.
